# Supplementary material for: Genome-Wide Association Study of Grain Architecture in Wild Wheat Aegilops tauschii
Source: PubMed Central journal article supplement (PMC5450224; doi:10.3389/fpls.2017.00886), 2017-05-31
Supplement: Presentation_1.pdf [file Presentation_1.pdf]

## Supplementary Information

### Genome-Wide Association Study of Grain Architecture in Wild Wheat *Aegilops tauschii*

Sanu Arora<sup>1,3</sup>, Narinder Singh<sup>2</sup>, Satinder Kaur<sup>1</sup>, Navtej Singh Bains<sup>1</sup>, Cristobal Uauy<sup>3</sup>, Jesse Poland<sup>2</sup>,  
Parveen Chhuneja\*<sup>1</sup>

<sup>1</sup> School of Agricultural Biotechnology, Punjab Agricultural University, Ludhiana, Punjab, 141004,  
India

<sup>2</sup> Wheat Genetics Resource Center, Department of Plant Pathology, Kansas State University,  
Manhattan, KS, 66506, USA

<sup>3</sup> Crop Genetics, John Innes Centre, Norwich Research Park, NR4 7UH, UK

\* Corresponding Author – Parveen Chhuneja, Email: [pchhuneja@pau.edu](mailto:pchhuneja@pau.edu) Fax: +91-161-2401444

| <b>PAU_Accession_No.</b> | <b>Original_Accession_No.</b> | <b>Origin</b> | <b>Lineage</b> | <b>Spike_type</b> |
|--------------------------|-------------------------------|---------------|----------------|-------------------|
| pau13                    | 79 TDO 6-3                    | Unknown       | L2             | S                 |
| pau17                    | 79 TD 18-3                    | Unknown       | L2             | S                 |
| pau3544                  | 349037                        | USSR          | L2             | S                 |
| pau3733                  | -                             | USSR          | L1             | T                 |
| pau3735                  | PI431600                      | USSR          | L1             | M                 |
| pau3742                  | O 2016/Clae2                  | Pakistan      | L1             | T                 |
| pau3744                  | O 2038                        | Afghanistan   | L1             | T                 |
| pau3746                  | O 2095/Clae6                  | Afghanistan   | L2             | T                 |
| pau3750                  | O 2118/Clae11                 | Iran          | L2             | S                 |
| pau3751                  | O 2119/Clae12                 | Iran          | L2             | S                 |
| pau3752                  | O 2123/Clae13                 | Iran          | L2             | S                 |
| pau3753                  | O2128/Clae14                  | Iran          | L1             | T                 |
| pau3755                  | O 2133                        | Iran          | L2             | S                 |
| pau3757                  | O 2137/Clae18                 | Iran          | L2             | S                 |
| pau3758                  | O 2139/Clae19                 | Iran          | L2             | T                 |
| pau3759                  | O2140                         | Unknown       | L1             | T                 |
| pau3760                  | O 2141                        | Iran          | L2             | S                 |
| pau3761                  | O 2142                        | Iran          | L2             | S                 |
| pau3766                  | O 2168/Clae27                 | Iran          | L1             | T                 |
| pau3769                  | O 2402                        | Unknown       | L2             | S                 |
| pau3784                  | O SANDO                       | Unknown       | L2             | T                 |
| pau3798                  | -                             | Unknown       | L2             | S                 |
| pau3799                  | -                             | Unknown       | L2             | S                 |
| pau3805                  | O M7-262                      | Iran          | L2             | S                 |
| pau3806                  | 0 0-623                       | Unknown       | L1             | T                 |
| pau3823                  | TQ 08                         | Iran          | L2             | S                 |
| pau3826                  | RL 5271                       | Unknown       | L1             | S                 |
| pau9785                  | TA1653                        | Tajikistan    | L1             | T                 |
| pau9787                  | TA1661                        | Azerbaijan    | L2             | S                 |
| pau9788                  | TA1664                        | Azerbaijan    | L2             | S                 |
| pau9790                  | TA1669                        | Azerbaijan    | L2             | S                 |
| pau9791                  | TA1670                        | Azerbaijan    | L1             | T                 |
| pau9795                  | TA1677                        | Azerbaijan    | L1             | T                 |
| pau9796                  | TA1686                        | Azerbaijan    | L2             | S                 |
| pau9798                  | TA1691                        | Japan         | L2             | S                 |
| pau9800                  | TA1694                        | Turkmenistan  | L2             | S                 |
| pau9804                  | TA 1717                       | Iran          | L2             | T                 |
| pau9806                  | TA 2458                       | Iran          | L2             | S                 |
| pau9807                  | TA 2460                       | Iran          | L2             | S                 |
| pau9809                  | TA2468                        | Iran          | L2             | S                 |
| pau9822                  | TA 2380                       | Pakistan      | L1             | T                 |
| pau9823                  | TA 2385                       | Pakistan      | L2             | T                 |
| pau9824                  | TA 2390                       | Afghanistan   | L1             | T                 |
| pau9829                  | TA 2419                       | Afghanistan   | L1             | T                 |

|          |          |              |    |   |
|----------|----------|--------------|----|---|
| pau9830  | TA 2420  | Afghanistan  | L1 | T |
| pau13757 | IG312287 | Unknown      | L1 | T |
| pau13761 | 312291   | Unknown      | L2 | M |
| pau13762 | IG312292 | Unknown      | L1 | T |
| pau13765 | IG312295 | Unknown      | L1 | T |
| pau13780 | -        | Unknown      | L1 | T |
| pau13781 | -        | Unknown      | L1 | T |
| pau14096 | AE145    | Azerbaijan   | L2 | S |
| pau14100 | AE149    | Unknown      | L1 | T |
| pau14102 | AE179    | Azerbaijan   | L2 | T |
| pau14103 | AE181    | Azerbaijan   | L1 | S |
| pau14104 | AE183    | Iran         | L1 | T |
| pau14105 | AE184    | Iran         | L1 | T |
| pau14106 | AE188    | Turkeminstan | L1 | T |
| pau14109 | AE191    | Azerbaijan   | L2 | S |
| pau14111 | AE193    | Afghanistan  | L1 | T |
| pau14113 | AE195    | Azerbaijan   | L2 | S |
| pau14115 | AE197    | Azerbaijan   | L2 | S |
| pau14116 | AE198    | Azerbaijan   | L2 | S |
| pau14118 | AE200    | Azerbaijan   | L2 | S |
| pau14122 | AE204    | Azerbaijan   | L2 | S |
| pau14128 | AE210    | Azerbaijan   | L2 | S |
| pau14129 | AE211    | Azerbaijan   | L2 | S |
| pau14130 | AE212    | Turkmenistan | L2 | S |
| pau14135 | AE217    | Azerbaijan   | L2 | S |
| pau14136 | AE218    | Azerbaijan   | L2 | S |
| pau14138 | AE220    | Azerbaijan   | L2 | S |
| pau14139 | AE221    | Azerbaijan   | L2 | S |
| pau14140 | AE222    | Azerbaijan   | L2 | S |
| pau14145 | AE228    | Azerbaijan   | L2 | S |
| pau14147 | AE230    | Azerbaijan   | L2 | S |
| pau14158 | AE241    | Uzbekistan   | L2 | S |
| pau14159 | AE242    | Turkmenistan | L2 | T |
| pau14160 | AE245    | Armenia      | L2 | T |
| pau14163 | AE248    | Turkeminstan | L1 | T |
| pau14165 | AE250    | Turkmenistan | L2 | S |
| pau14166 | AE251    | Azerbaijan   | L2 | T |
| pau14170 | AE256    | Kyrgyzstan   | L2 | S |
| pau14174 | AE261    | Azerbaijan   | L1 | T |
| pau14175 | AE262    | Azerbaijan   | L2 | S |
| pau14177 | AE264    | Azerbaijan   | L1 | T |
| pau14180 | AE267    | Azerbaijan   | L2 | S |
| pau14181 | AE268    | Azerbaijan   | L2 | S |
| pau14185 | AE273    | Azerbaijan   | L2 | S |
| pau14186 | AE275    | Afghanistan  | L2 | S |

|          |        |              |    |   |
|----------|--------|--------------|----|---|
| pau14187 | AE276  | Afghanistan  | L2 | S |
| pau14190 | AE279  | Afghanistan  | L2 | S |
| pau14194 | AE291  | Turkmenistan | L2 | S |
| pau14197 | AE422  | Unknown      | L1 | T |
| pau14200 | AE425  | Unknown      | L2 | S |
| pau14201 | AE426  | Unknown      | L2 | S |
| pau14203 | AE428  | Unknown      | L2 | M |
| pau14204 | AE429  | Unknown      | L2 | S |
| pau14205 | AE430  | Unknown      | L2 | T |
| pau14206 | AE431  | Unknown      | L2 | T |
| pau14209 | AE434  | Unknown      | L2 | T |
| pau14210 | AE454  | Georgia      | L2 | S |
| pau14211 | AE457  | Georgia      | L2 | S |
| pau14214 | AE472  | Turkeminstan | L1 | T |
| pau14217 | AE490  | Soveit Union | L2 | T |
| pau14223 | AE541  | Iran         | L2 | T |
| pau14227 | AE636  | Turkmenistan | L2 | S |
| pau14228 | AE637  | Turkeminstan | L1 | T |
| pau14229 | AE639  | Soveit Union | L1 | M |
| pau14230 | AE647  | Tajikistan   | L1 | T |
| pau14231 | AE692  | Soveit Union | L2 | S |
| pau14232 | AE721  | Armenia      | L2 | T |
| pau14236 | AE817  | Tajikistan   | L1 | T |
| pau14237 | AE841  | Turkmenistan | L2 | T |
| pau14238 | AE858  | Tadzhikistan | L2 | T |
| pau14240 | AE933  | Georgia      | L2 | S |
| pau14241 | AE938  | Armenia      | L2 | S |
| pau14242 | AE940  | Armenia      | L2 | T |
| pau14246 | AE964  | Turkmenistan | L2 | S |
| pau14251 | AE1055 | Azerbaijan   | L1 | T |
| pau14253 | AE1069 | Syria        | L1 | T |
| pau14254 | AE1087 | Afghanistan  | L1 | T |
| pau14323 | 7-2    | Unknown      | L2 | S |
| pau14325 | 11-1   | Unknown      | L1 | T |
| pau14330 | 16-4   | Unknown      | L2 | S |
| pau14334 | 20-2   | Unknown      | L2 | S |
| pau14336 | 21-3   | Unknown      | L2 | S |
| pau14337 | 21-4   | Unknown      | L2 | S |
| pau14338 | 22-2   | Unknown      | L2 | S |
| pau14339 | 22-3   | Unknown      | L2 | S |
| pau14340 | 22-4   | Unknown      | L2 | S |
| pau14341 | 24-4   | Unknown      | L2 | S |
| pau14343 | 27-2   | Unknown      | L2 | S |
| pau14345 | 28-2   | Unknown      | L2 | S |
| pau14347 | 28-4   | Unknown      | L2 | M |

|           |           |              |              |   |
|-----------|-----------|--------------|--------------|---|
| pau14348  | 32-1      | Unknown      | L2           | S |
| pau14351  | 34-2      | Unknown      | L1           | T |
| pau14352  | 34-3      | Unknown      | L1           | T |
| pau14353  | 34-4      | Unknown      | L1           | T |
| pau14354  | 35-1      | Unknown      | L1           | T |
| pau14355  | 36-4      | Unknown      | L1           | T |
| pau14356  | 37-3      | Unknown      | L2           | S |
| pau14359  | 40-1      | Unknown      | L2           | S |
| pau14360  | 40-2      | Unknown      | L2           | S |
| pau14362  | 40-4      | Unknown      | L2           | S |
| pau14576  | 30-2      | Unknown      | L2           | S |
| pau14578  | 89809-A   | Unknown      | L1           | T |
| pau14582  | 23-4      | Unknown      | L2           | S |
| pau14583  | 26-2      | Unknown      | L2           | S |
| pau14586  | 30-4      | Unknown      | L2           | T |
| pau14953  | AE061D    | Pakistan     | L1           | T |
| pau14954  | Clae-8    | Iran         | L2           | S |
| pau14957  | Clae-17   | Iran         | L2           | S |
| pau14958  | Clae-18   | Iran         | L2           | S |
| pau14960  | Clae24    | Iran         | L2           | S |
| pau14962  | AE061D    | Iran         | L1           | T |
| pau14966  | AE091D    | Unknown      | L1           | T |
| pau14967  | Clae72    | Unknown      | L2           | S |
| pau14968  | AE061D    | Afghanistan  | L1           | T |
| pau14970  | AE061D    | Unknown      | L1           | T |
| pau14972  | PI-349037 | Azerbaijan   | L2           | S |
| pau14973  | PI-369627 | Unknown      | L2           | S |
| pau14974  | PI-428563 | Georgia      | L2           | S |
| pau14975  | AE061D    | Turkmenistan | L1           | T |
| pau14979  | PI 486270 | Turkey       | L1           | T |
| pau14985  | AE951D    | Unknown      | L1           | M |
| pau14990  | PI 560756 | Turkey       | L1           | T |
| pau14992  | TA1651    | Iran         | L2           | S |
| pau14995  | TA1695    | Japan        | L2           | S |
| pau14998  | PI 603250 | Iran         | L2           | S |
| pau14999  | AE991D    | Iran         | L1           | T |
| pau13764* | IG312294  | Unknown      | Intermediate | T |
| pau14088* | -         | Soviet Union | Intermediate | T |
| pau14091* | AE67      | Unknown      | Intermediate | S |
| pau14092* | AE141     | Turkeminstan | Intermediate | T |
| pau14156* | AE239     | Uzbekistan   | Intermediate | S |
| pau14162* | AE247     | Turkeminstan | Intermediate | T |
| pau14195* | AE398     | Turkeminstan | Intermediate | T |

**Table S2: Descriptive statistics for grain size descriptors of two *Ae. tauschii* lineages (L1, L2) for grain length; grain width and grain weight**

| Trait             | Lineage 1 (L1) |      |       | Lineage 2 (L2) |      |       |
|-------------------|----------------|------|-------|----------------|------|-------|
|                   | Mean           | S.D. | C.V%  | Mean           | S.D. | C.V%  |
| Grain length (mm) | 5.15           | 0.31 | 6.00  | 5.18           | 0.37 | 7.00  |
| Grain width (mm)  | 2.48           | 0.20 | 8.00  | 2.66           | 0.19 | 7.00  |
| Grain weight (mg) | 0.60           | 0.12 | 20.00 | 0.77           | 0.10 | 14.00 |

**Table S3: Mean grain weight and width for each allele of the associated SNP in both lineages**

| Trait        | SNP ID    | Allele 1-L1 | Allele 2 – L1 | Allele 1 –L2 | Allele 2 – L2 |
|--------------|-----------|-------------|---------------|--------------|---------------|
| Grain Weight | AT_87410  | A = 0.55    | G = 0.62      | A = 0.77     | G = 0.82      |
|              | AT_8483   | A = 0.55    | C = 0.61      | A = X        | C = 0.78      |
|              | AT_95167  | A = 0.47    | C = 0.62      | A = X        | C = 0.77      |
|              | AT_27138  | A = 0.56    | G = 0.67      | A = 0.76     | G = X         |
| Grain Width  | AT_85128  | C = 2.41    | G = 2.58      | C = 2.64     | G = 2.85      |
|              | AT_16015  | C = 2.36    | G = 2.72      | C = 2.65     | G = 2.85      |
|              | AT_67956  | C = 2.41    | T = X         | C = 2.54     | T = 2.70      |
|              | AT_96298  | A = 2.41    | G = X         | A = X        | G = 2.64      |
|              | AT_27226  | C = 2.42    | G = X         | C = 2.85     | G = 2.61      |
|              | AT_104405 | A = 2.45    | G = 2.41      | A = 2.69     | G = 2.57      |
|              | AT_3134   | A = 2.42    | G = X         | A = 2.53     | G = 2.79      |
|              | AT_629    | G = 2.45    | A = X         | G = 2.61     | A = 2.81      |

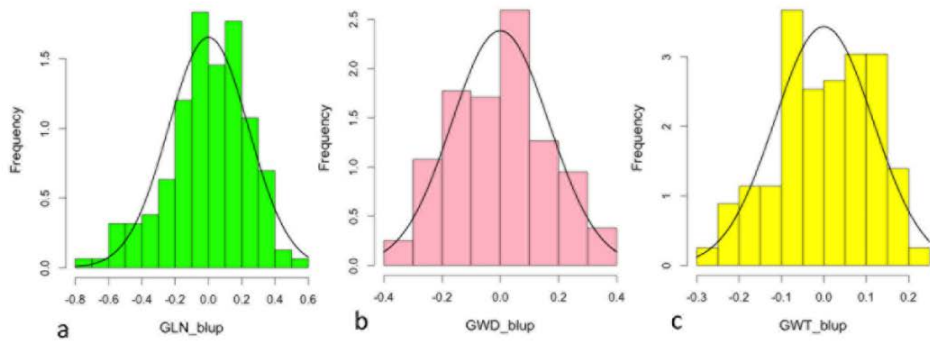

**Supplementary Figure S1.** Distribution of best linear unbiased predictions (BLUP) values with normality curve for grain (a) grain length (b) grain width and (c) grain weight.

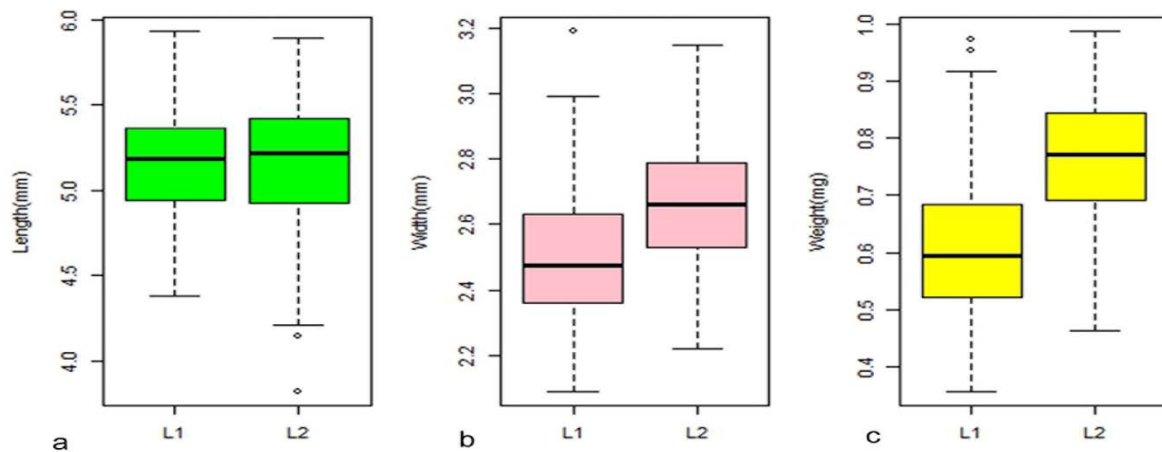

**Supplementary Figure S2:** Boxplots showing mean, median and range of phenotypic variation for the two lineages of *Ae. tauschii* for (a) grain length (mm) (b) grain width (mm) and (c) grain weight (mg).
